# Supplementary material
Source: MDPI journal article supplement (https://www.mdpi.com/1996-1073/14/14/4205)
Supplement: s1 [file s1 › energies-1248253-supplementary.pdf]

## Supplementary Materials

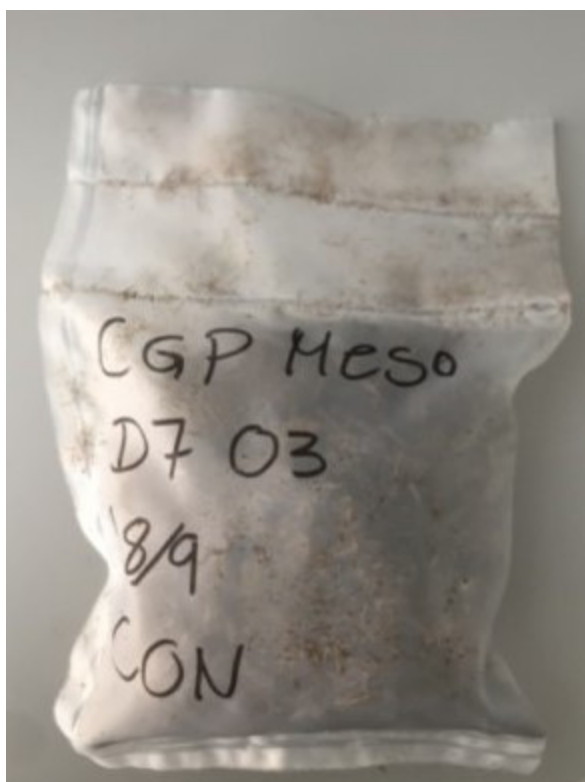

**Figure S1.** Individual AFB with CGP substrate after retrieval, washing and drying.

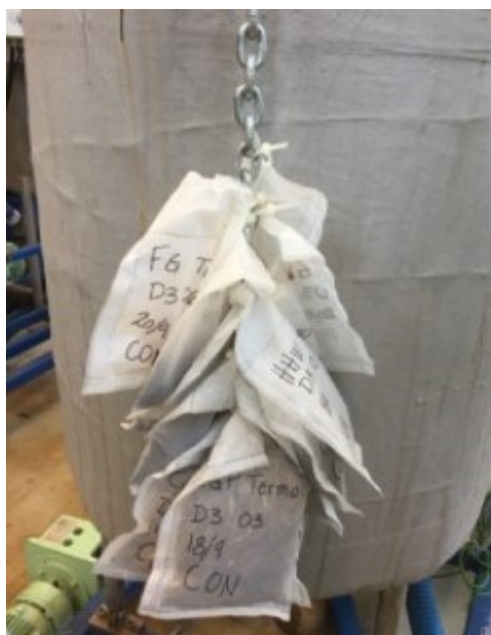

**Figure S2.** AFBs attached to a stainless steel chain, before immersion in continuous reactor.
